# Supplementary material
Source: Springer Nature journal article supplement (https://www.springermedizin.de/resource/supplementary/12939_2010_181_MOESM1_ESM.pdf/9550596)

**A**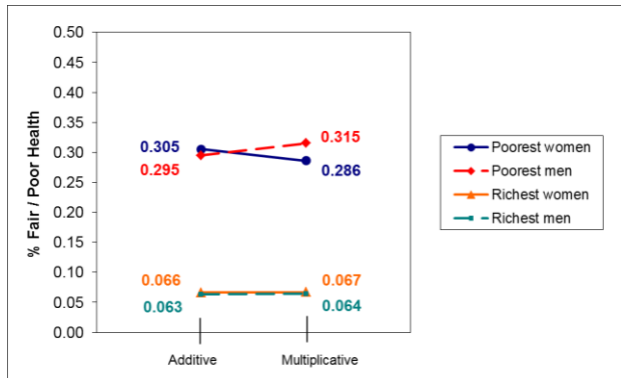**B**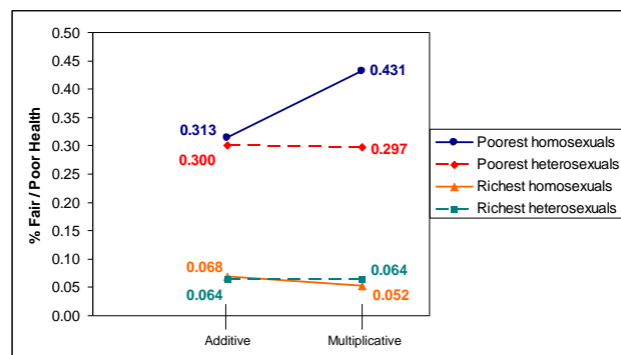**C**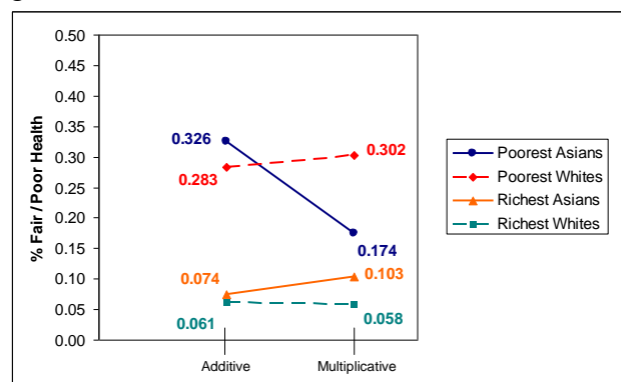**D**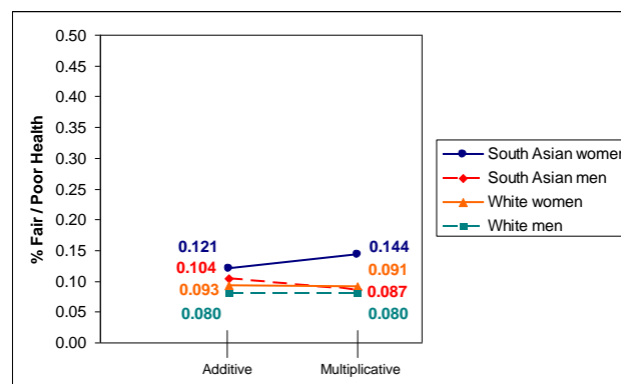

Supplement: MOESM1 [file 9550596]
